# Supplementary material
Source: Springer Nature journal article supplement (https://www.springermedizin.de/resource/supplementary/12883_2013_1050_MOESM2_ESM.pdf/9456424)
Supplement: MOESM2 [file 9456424]

Supplemental table2. proportional ordinal logistic regression for the grades of CMBs without the patients with renal failure. .

| Variables                                             | N   | unadjusted<br>OR | 95% CI    | <i>p</i> | adjusted<br>OR | 95% CI    | <i>p</i> |
|-------------------------------------------------------|-----|------------------|-----------|----------|----------------|-----------|----------|
| Categories of estimated GFR,ml/min/1.73m <sup>2</sup> |     |                  |           |          |                |           |          |
| Q4(≤66.1)                                             | 158 | 2.01             | 1.75-5.07 | <0.01    | 1.28           | 0.23-2.66 | 0.16     |
| Q3(66.1-78.8)                                         | 175 | 1.25             | 0.81-2.34 | 0.27     | 0.78           | 0.59-2.83 | 0.40     |
| Q2(78.8-94.7)                                         | 164 | 0.77             | 0.77-2.21 | 0.32     | 1.11           | 0.49-1.64 | 0.31     |
| Q1(≥94.7),ref                                         | 173 |                  |           |          |                |           |          |
| <i>p</i> for trend                                    |     |                  |           | <0.01    |                |           | 0.35     |
| Quartiles of Cystatin C, nmol/L                       |     |                  |           |          |                |           |          |
| Q4(≥66.7)                                             | 156 | 2.40             | 1.40-3.40 | <0.01    | 1.88           | 1.05-3.38 | 0.03     |
| Q3(54.7-66.7)                                         | 172 | 1.85             | 1.10-3.13 | 0.02     | 1.24           | 0.74-2.08 | 0.26     |
| Q2(47.2-54.7)                                         | 162 | 1.45             | 0.61-1.58 | 0.16     | 1.21           | 0.49-1.41 | 0.27     |
| Q1(≤47.2), ref                                        | 180 |                  |           |          |                |           |          |
| <i>p</i> for trend                                    |     |                  |           | <0.01    |                |           | 0.03     |

\* adjusted for covariates; age, sex, total cholesterol, diabetes, hypertension, dyslipidemia, previous heart disease, smoking, previous anti thrombotic or anticoagulant use, and white matter lesions
